# Supplementary material
Source: PubMed Central journal article supplement (PMC4862201)
Supplement: NIHMS782572-supplement-SFig2.pdf [file NIHMS782572-supplement-SFig2.pdf]

## THP-1 cell derived MPs increase ICAM on huDMVECs

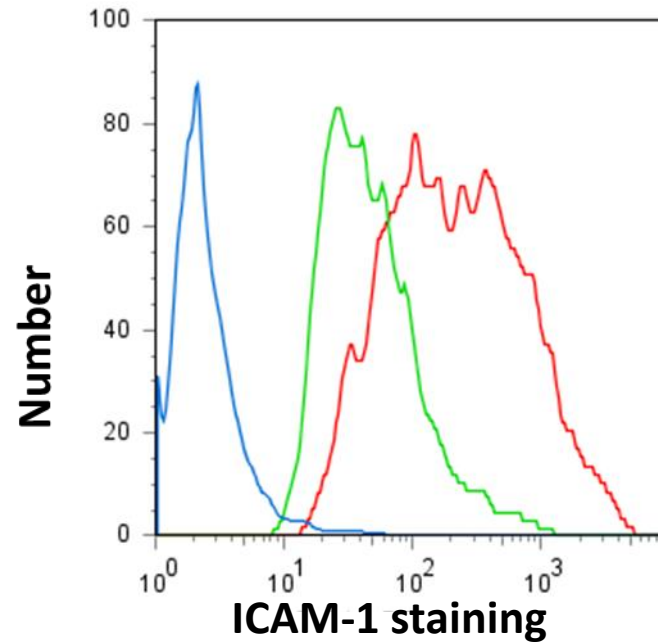

Flow cytometry histogram showing ICAM-1 immunostaining of huDMVEC after incubation with THP-1 cell derived MPs (red curve) (10:1 MP:huDMVEC ratio). Untreated cells are shown in green curve. Unstained cells are shown in blue.
